# Supplementary material
Source: PubMed Central journal article supplement (PMC2804470)
Supplement: NIHMS158220-supplement-01.pdf [file NIHMS158220-supplement-01.pdf]

## Supplemental Data

### AP24534, a Pan-BCR-ABL Inhibitor for Chronic

### Myeloid Leukemia, Potently Inhibits the T315I

### Mutant and Overcomes Mutation-Based Resistance

Thomas O'Hare, William C. Shakespeare, Xiaotian Zhu, Christopher A. Eide, Victor M. Rivera, Frank Wang, Lauren T. Adrian, Tianjun Zhou, Wei-Sheng Huang, Qihong Xu, Chester A. Metcalf III, Jeffrey W. Tyner, Marc M. Loriaux, Amie S. Corbin, Scott Wardwell, Yaoyu Ning, Jeffrey A. Keats, Yihan Wang, Raji Sundaramoorthi, Mathew Thomas, Dong Zhou, Joseph Snodgrass, Lois Commodore, Tomi K. Sawyer, David C. Dalgarno, Michael W.N. Deininger, Brian J. Druker, and Tim Clackson

**Figure S1: Inhibition of BCR-ABL phosphorylation in Ba/F3 cells expressing native BCR-ABL or BCR-ABL<sup>T315I</sup>.** BCR-ABL phosphorylation was evaluated in Ba/F3 cells expressing either (A) native BCR-ABL or (B) BCR-ABL<sup>T315I</sup> treated for 4 hr with imatinib, nilotinib, dasatinib, or AP24534. Samples were analyzed by immunoblot analysis with antibodies against pBCR-ABL and eIF4E (loading control). The phosphorylation status of CrkL in these same lysates was determined by immunoblot analysis as described in [Figure 3](#).

**Figure S2: Colony formation assays for CML T315I patient and normal primary cells against AP24534.** Mononuclear cells from a CML accelerated phase (AP) patient harboring BCR-ABL<sup>T315I</sup> and from a healthy individual were plated in methylcellulose containing nilotinib, dasatinib, or AP24534 and cultured for 14-18 days. Colonies were counted under an inverted microscope, and results were expressed as the mean of three replicates (error bars represent S.E.M.).

(A) Colony formation assays in the presence of AP24534 using mononuclear cells from a CML AP patient harboring BCR-ABL<sup>T315I</sup>.

(B) Colony formation assays in the presence of AP24534 using mononuclear cells from a healthy individual.

**Figure S3: Effect of dasatinib in mouse models using Ba/F3 cells expressing BCR-ABL<sup>T315I</sup>.**

Survival curves are shown for mice injected intravenously with Ba/F3 cells expressing BCR-ABL<sup>T315I</sup> treated during the indicated dosing period with vehicle or dasatinib by oral gavage. Median survival was calculated using the Kaplan-Meier method, and statistical significance was evaluated with a Log-rank test (GraphPad PRISM) by comparing the survival time of each treatment group with the vehicle group.

**Table S1: AP24534 kinase panel screening data**

**Table S2: Tabulated AP24534 single-agent mutagenesis data (starting from Ba/F3 native BCR-ABL cells)**

**Table S3: Tabulated AP24534 single-agent mutagenesis data (starting from Ba/F3 BCR-ABL<sup>T315I</sup> cells)**

**Table S4: Tabulated AP24534 single-agent mutagenesis data (starting from Ba/F3 BCR-ABL<sup>E255V</sup> cells)**

**Table S5: BCR-ABL compound mutations involving T315I or E255V conferring moderate to high level resistance to AP24534**

**Figure S1.**

**A**

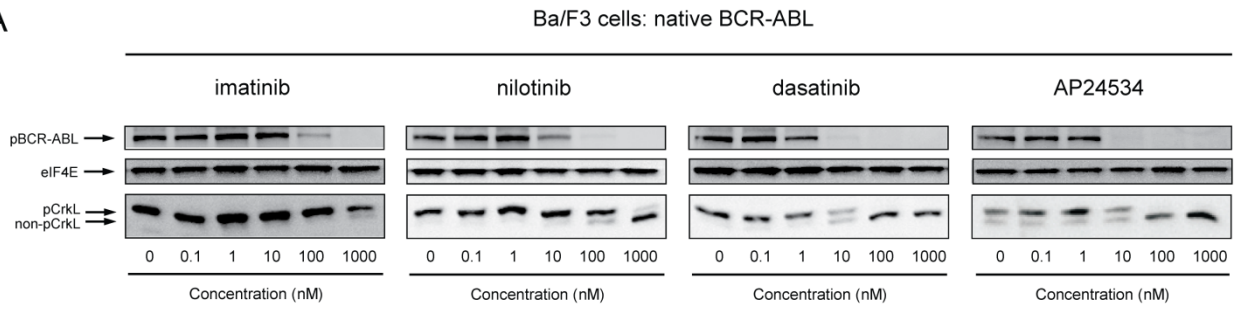

**B**

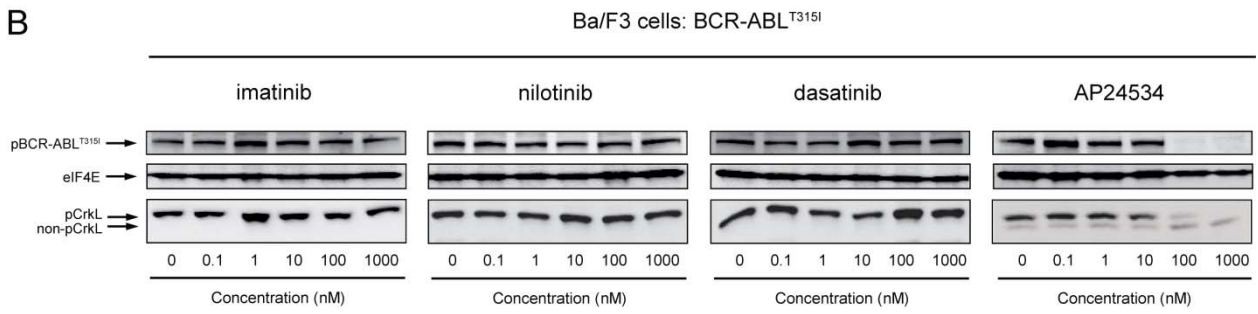

Figure S2.

A

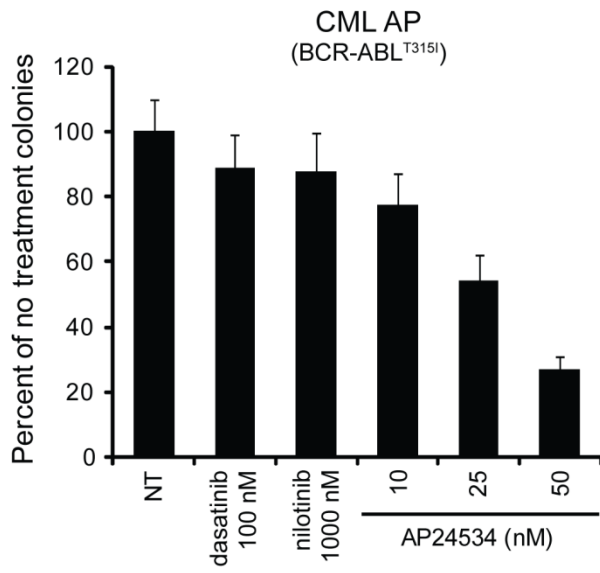

B

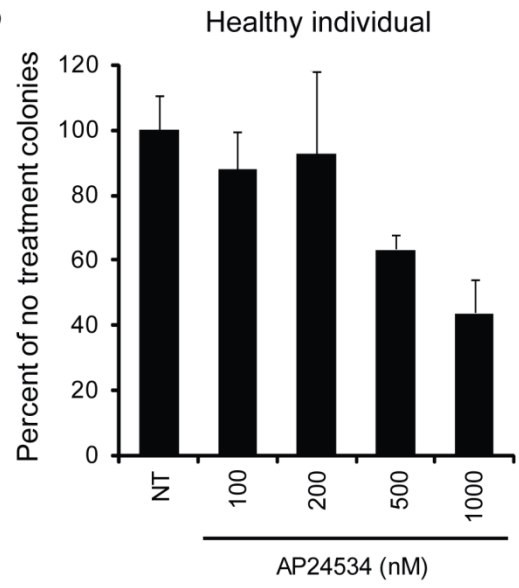

Figure S3.

Ba/F3 cells: BCR-ABL<sup>T315I</sup>

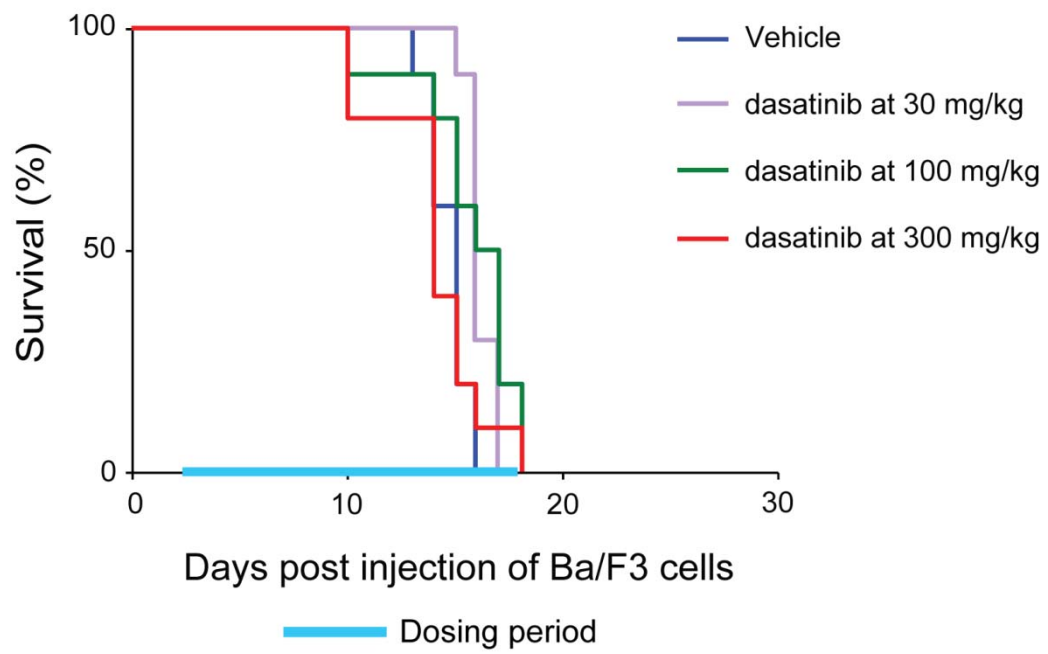

**Table S1.** AP24534 Kinase Panel Screening Data

| IC <sub>50</sub> < 10 nM |                       | IC <sub>50</sub> < 50 nM |                       | IC <sub>50</sub> ≤ 250 nM |                       | IC <sub>50</sub> > 250 nM |                       |
|--------------------------|-----------------------|--------------------------|-----------------------|---------------------------|-----------------------|---------------------------|-----------------------|
| Kinase                   | IC <sub>50</sub> (nM) | Kinase                   | IC <sub>50</sub> (nM) | Kinase                    | IC <sub>50</sub> (nM) | Kinase                    | IC <sub>50</sub> (nM) |
| ABL                      | 0.37                  | BMX                      | 47.2                  | BRK                       | 50.6                  | AKT2                      | >1000                 |
| ABL <sup>Q252H</sup>     | 0.44                  | CSK                      | 12.7                  | EGFR <sup>L858R</sup>     | 211                   | ALK                       | >1000                 |
| ABL <sup>Y253F</sup>     | 0.3                   | DDR2                     | 16.1                  | EPHA1                     | 143                   | Aurora A                  | >1000                 |
| ABL <sup>T315I</sup>     | 2                     | EPHB4                    | 10.2                  | ERBB4                     | 176                   | Aurora B                  | 543                   |
| ABL <sup>M351T</sup>     | 0.3                   | FGFR3                    | 18.2                  | JAK2                      | 169                   | Aurora C                  | >1000                 |
| ABL <sup>H396P</sup>     | 0.34                  | FLT3                     | 12.6                  | JAK3                      | 91.1                  | AXL                       | >1000                 |
| ARG                      | 0.76                  | JAK1                     | 32.2                  | KIT <sup>V654A</sup>      | 77.8                  | BTK                       | 849                   |
| BLK                      | 6.1                   | c-KIT                    | 12.5                  | KIT <sup>D816V</sup>      | 152                   | BTK <sup>E41K</sup>       | >1000                 |
| EPHA2                    | 2.1                   | KIT <sup>D816H</sup>     | 16                    | TYK2                      | 177                   | CDK2/CyclinE              | >1000                 |
| EPHA3                    | 6.7                   | PDGFRα <sup>D842V</sup>  | 15.6                  |                           |                       | CTK                       | >1000                 |
| EPHA4                    | 1.1                   | PYK2                     | 35.1                  |                           |                       | EGFR                      | >1000                 |
| EPHA5                    | 0.69                  | TIE2                     | 14.3                  |                           |                       | EGFR <sup>L861Q</sup>     | 536                   |
| EPHA7                    | 8.5                   | TRKA                     | 11.4                  |                           |                       | EGFR <sup>T790M</sup>     | >1000                 |
| EPHA8                    | 2.5                   | TRKB                     | 15.1                  |                           |                       | ERBB2                     | >1000                 |
| EPHB1                    | 1.2                   | TRKC                     | 13.2                  |                           |                       | FAK                       | >1000                 |
| EPHB2                    | 0.63                  |                          |                       |                           |                       | FER                       | 560                   |
| EPHB3                    | 1.1                   |                          |                       |                           |                       | FES                       | 768                   |
| FGFR1                    | 2.23                  |                          |                       |                           |                       | FLT3 <sup>D835Y</sup>     | 948                   |
| FGFR1 <sup>V561M</sup>   | 7.3                   |                          |                       |                           |                       | IGF-1R                    | >1000                 |
| FGFR2                    | 1.6                   |                          |                       |                           |                       | IR                        | >1000                 |
| FGFR2 <sup>N549H</sup>   | 0.45                  |                          |                       |                           |                       | IRR                       | >1000                 |
| FGFR4                    | 7.7                   |                          |                       |                           |                       | ITK                       | >1000                 |
| FGR                      | 0.45                  |                          |                       |                           |                       | c-MER                     | 406                   |
| FMS                      | 8.6                   |                          |                       |                           |                       | c-MET                     | >1000                 |
| FRK                      | 1.3                   |                          |                       |                           |                       | mTOR                      | >1000                 |
| FYN                      | 0.36                  |                          |                       |                           |                       | MUSK                      | 694                   |
| HCK                      | 0.11                  |                          |                       |                           |                       | PI3Kα                     | >1000                 |
| KIT <sup>V560G</sup>     | 0.41                  |                          |                       |                           |                       | PKA                       | 613                   |
| LCK                      | 0.28                  |                          |                       |                           |                       | PKCθ                      | >1000                 |
| LYN                      | 0.24                  |                          |                       |                           |                       | RON                       | >1000                 |
| LYNB                     | 0.21                  |                          |                       |                           |                       | ROS                       | >1000                 |
| PDGFRα                   | 1.1                   |                          |                       |                           |                       | SRC <sup>T341M</sup>      | >1000                 |
| PDGFRα <sup>V561D</sup>  | 0.84                  |                          |                       |                           |                       | SYK                       | >1000                 |
| PDGFRα <sup>T674I</sup>  | 3                     |                          |                       |                           |                       | TEC                       | >1000                 |
| PDGFRβ                   | 7.7                   |                          |                       |                           |                       | TYK1                      | >1000                 |
| RET                      | 0.16                  |                          |                       |                           |                       | TYRO3                     | >1000                 |
| RET <sup>V804L</sup>     | 3.7                   |                          |                       |                           |                       | ZAP70                     | >1000                 |
| RET <sup>V804M</sup>     | 1.4                   |                          |                       |                           |                       |                           |                       |
| c-SRC                    | 5.4                   |                          |                       |                           |                       |                           |                       |
| VEGFR1                   | 3.7                   |                          |                       |                           |                       |                           |                       |
| VEGFR2                   | 1.5                   |                          |                       |                           |                       |                           |                       |
| VEGFR3                   | 2.3                   |                          |                       |                           |                       |                           |                       |
| YES                      | 0.89                  |                          |                       |                           |                       |                           |                       |

**Table S2.** AP24534 cell-based mutagenesis assay (starting from native BCR-ABL)

Ba/F3 cells expressing native BCR-ABL

| Concentration | Wells surveyed | Wells with outgrowth | Clones sequenced (N) | By specific mutation |                 |                            | By residue |                 |                          |      |
|---------------|----------------|----------------------|----------------------|----------------------|-----------------|----------------------------|------------|-----------------|--------------------------|------|
|               |                |                      |                      | Mutant(s)            | Occurrences (n) | Frequency among clones (%) | Residue    | Occurrences (n) | Frequency by residue (%) |      |
| 5 nM          | 576            | 576                  | 51                   | Native BCR-ABL       | 46              | 90.2                       | ---        | ---             | ---                      | ---  |
|               |                |                      |                      | G250E                | 1               | 2.0                        | 20.0       | G250            | 1                        | 20.0 |
|               |                |                      |                      | Y253H                | 1               | 2.0                        | 20.0       | Y253            | 1                        | 20.0 |
|               |                |                      |                      | E255K                | 1               | 2.0                        | 20.0       | E255            | 1                        | 20.0 |
|               |                |                      |                      | T315I                | 1               | 2.0                        | 20.0       | T315            | 1                        | 20.0 |
|               |                |                      |                      | F317I                | 1               | 2.0                        | 20.0       | F317            | 1                        | 20.0 |
| 10 nM         | 1440           | 168                  | 157                  | Native BCR-ABL       | 105             | 66.9                       | ---        | ---             | ---                      | ---  |
|               |                |                      |                      | G250E                | 1               | 0.6                        | 1.9        | G250            | 1                        | 1.9  |
|               |                |                      |                      | Q252H                | 4               | 2.5                        | 7.7        | Q252            | 4                        | 7.7  |
|               |                |                      |                      | Y253F                | 1               | 0.6                        | 1.9        | Y253            | 7                        | 13.5 |
|               |                |                      |                      | Y253H                | 6               | 3.8                        | 11.5       |                 |                          |      |
|               |                |                      |                      | E255K                | 12              | 7.6                        | 23.1       | E255            | 19                       | 36.5 |
|               |                |                      |                      | E255V                | 7               | 4.5                        | 13.5       |                 |                          |      |
|               |                |                      |                      | K285N                | 1               | 0.6                        | 1.9        | K285            | 1                        | 1.9  |
|               |                |                      |                      | E292V                | 1               | 0.6                        | 1.9        | E292            | 1                        | 1.9  |
|               |                |                      |                      | L298V                | 2               | 1.3                        | 3.8        | L298            | 2                        | 3.8  |
|               |                |                      |                      | T315I                | 7               | 4.5                        | 13.5       | T315            | 7                        | 13.5 |
|               |                |                      |                      | F317I                | 1               | 0.6                        | 1.9        | F317            | 1                        | 1.9  |
|               |                |                      |                      | V339G                | 1               | 0.6                        | 1.9        | V339            | 1                        | 1.9  |
|               |                |                      |                      | F359C                | 2               | 1.3                        | 3.8        | F359            | 5                        | 9.6  |
|               |                |                      |                      | F359I                | 3               | 1.9                        | 5.8        |                 |                          |      |
|               |                |                      |                      | L387F                | 2               | 1.3                        | 3.8        |                 |                          |      |
| S438C         | 1              | 0.6                  | 1.9                  | S438                 | 1               | 1.9                        |            |                 |                          |      |
| 20 nM         | 1440           | 3                    | 3                    | E255V                | 1               | 33.3                       | 33.3       | E255            | 1                        | 33.3 |
|               |                |                      |                      | T315I                | 2               | 66.7                       | 100.0      | T315            | 2                        | 66.7 |
| 40 nM         | 1440           | 0                    | 0                    | ---                  | ---             | ---                        | ---        | ---             | ---                      |      |





**Table S4.** AP24534 cell-based mutagenesis assay (starting from BCR-ABL<sup>E255V</sup>)Ba/F3 cells expressing BCR-ABL<sup>E255V</sup>

| Concentration | Wells surveyed | Wells with outgrowth | Clones sequenced (N) | By specific compound mutation (with E255V) |                 |                            |                             | By residue |                 |                          |
|---------------|----------------|----------------------|----------------------|--------------------------------------------|-----------------|----------------------------|-----------------------------|------------|-----------------|--------------------------|
|               |                |                      |                      | Mutant(s)                                  | Occurrences (n) | Frequency among clones (%) | Frequency among mutants (%) | Residue    | Occurrences (n) | Frequency by residue (%) |
| 80 nM         | 480            | 152                  | 123                  | E255V only                                 | 104             | 84.6                       | ---                         | ---        | ---             | ---                      |
|               |                |                      |                      | G250E                                      | 2               | 1.6                        | 10.5                        | G250       | 2               | 10.5                     |
|               |                |                      |                      | Q252H                                      | 1               | 0.8                        | 5.3                         | Q252       | 1               | 5.3                      |
|               |                |                      |                      | Y253H                                      | 5               | 4.1                        | 26.3                        | Y253       | 5               | 26.3                     |
|               |                |                      |                      | E292V                                      | 1               | 0.8                        | 5.3                         | E292       | 1               | 5.3                      |
|               |                |                      |                      | F311I                                      | 2               | 1.6                        | 10.5                        | F311       | 2               | 10.5                     |
|               |                |                      |                      | T315I                                      | 1               | 0.8                        | 5.3                         | T315       | 1               | 5.3                      |
|               |                |                      |                      | E355G                                      | 1               | 0.8                        | 5.3                         | E355       | 1               | 5.3                      |
|               |                |                      |                      | F359C                                      | 3               | 2.4                        | 15.8                        | F359       | 5               | 26.3                     |
|               |                |                      |                      | F359I                                      | 2               | 1.6                        | 10.5                        | F359       | 5               | 26.3                     |
| H396R         | 1              | 0.8                  | 5.3                  | H396                                       | 1               | 5.3                        |                             |            |                 |                          |
| 160 nM        | 480            | 9                    | 6                    | Y253F                                      | 1               | 16.7                       | 16.7                        | Y253       | 3               | 50.0                     |
|               |                |                      |                      | Y253H                                      | 2               | 33.3                       | 33.3                        | Y253       | 3               | 50.0                     |
|               |                |                      |                      | T315I                                      | 3               | 50.0                       | 50.0                        | T315       | 3               | 50.0                     |
| 320 nM        | 480            | 1                    | 1                    | T315I                                      | 1               | 100.0                      | 100.0                       | T315       | 1               | 100.0                    |
| 640 nM        | 480            | 0                    | 0                    | ---                                        | ---             | ---                        | ---                         | ---        | ---             | ---                      |

**Table S5.** BCR-ABL compound mutations involving T315I or E255V conferring moderate to high level resistance to AP24534

| Compound mutant | AP24534 concentration at which recovered in screen |        |        | Reported clinically (refs.) |
|-----------------|----------------------------------------------------|--------|--------|-----------------------------|
|                 | 80 nM                                              | 160 nM | 320 nM |                             |
| T315I / Q252H   | ✓                                                  |        |        | NR                          |
| T315I / Y253H   | ✓                                                  | ✓      |        | (1), (2)                    |
| T315I / E255K   | ✓                                                  |        |        | (3)                         |
| T315I / E255V   | ✓                                                  | ✓      | ✓      | NR                          |
| T315I / F311I   | ✓                                                  |        |        | (2)                         |
| T315I / F311V   | ✓                                                  |        |        | NR                          |
| T315I / A380S   | ✓                                                  |        |        | NR                          |
| E255V / G250E   | ✓                                                  |        |        | NR                          |
| E255V / Q252H   | ✓                                                  |        |        | NR                          |
| E255V / Y253F   |                                                    | ✓      |        | NR                          |
| E255V / Y253H   | ✓                                                  | ✓      |        | NR                          |
| E255V / E292V   | ✓                                                  |        |        | NR                          |
| E255V / F311I   | ✓                                                  |        |        | NR                          |
| E255V / E355G   | ✓                                                  |        |        | NR                          |
| E255V / F359C   | ✓                                                  |        |        | NR                          |
| E255V / F359I   | ✓                                                  |        |        | NR                          |
| E255V / H396R   | ✓                                                  |        |        | NR                          |

(1) Shah et al. (2007). *JCI* 117, 2562-2569.

(2) Khorashad et al. (2008). *Blood* 111, 2378-2381.

(3) Stagno et al. (2008). *Leuk. Res.* 32, 673-674.

NOTE: The following clinically reported compound mutants were not detected in this screen: V299L / E255V.

Abbreviations: NR, not reported.
